# Supplementary material for: Larval body patterning and apical organs are conserved in animal evolution
Source: PubMed Central journal article supplement (PMC3939940; doi:10.1186/1741-7007-12-7), 2014-01-29
Supplement: 1741-7007-12-7-S2.pdf [file 1741-7007-12-7-S2.pdf]

Ces-2 NJ

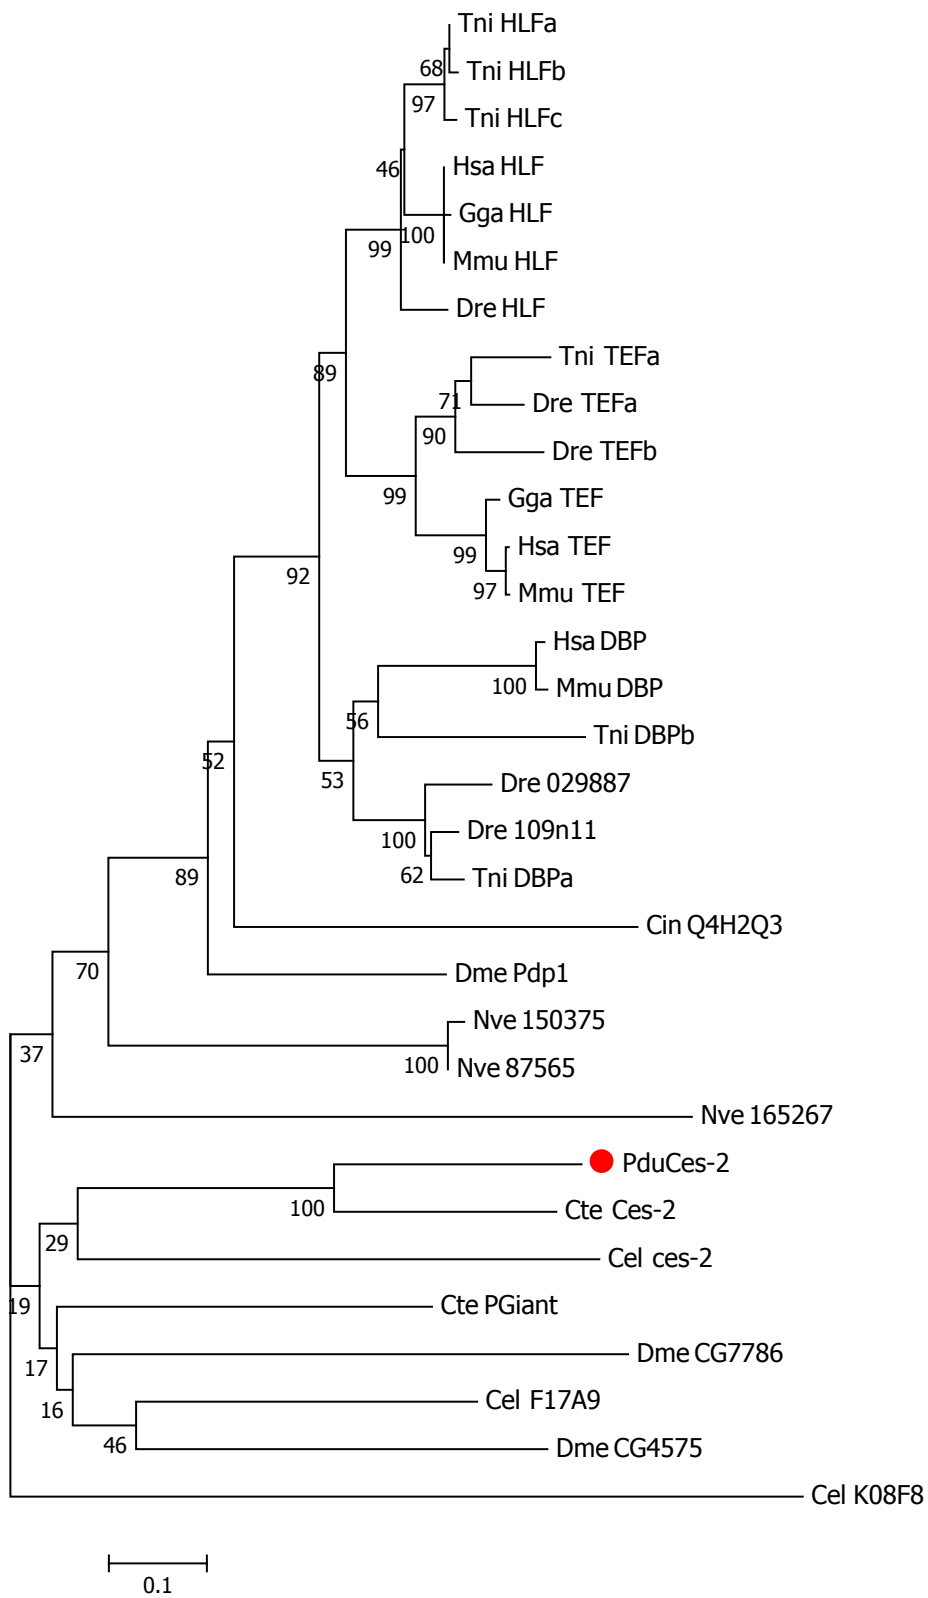

Ces-2 ML

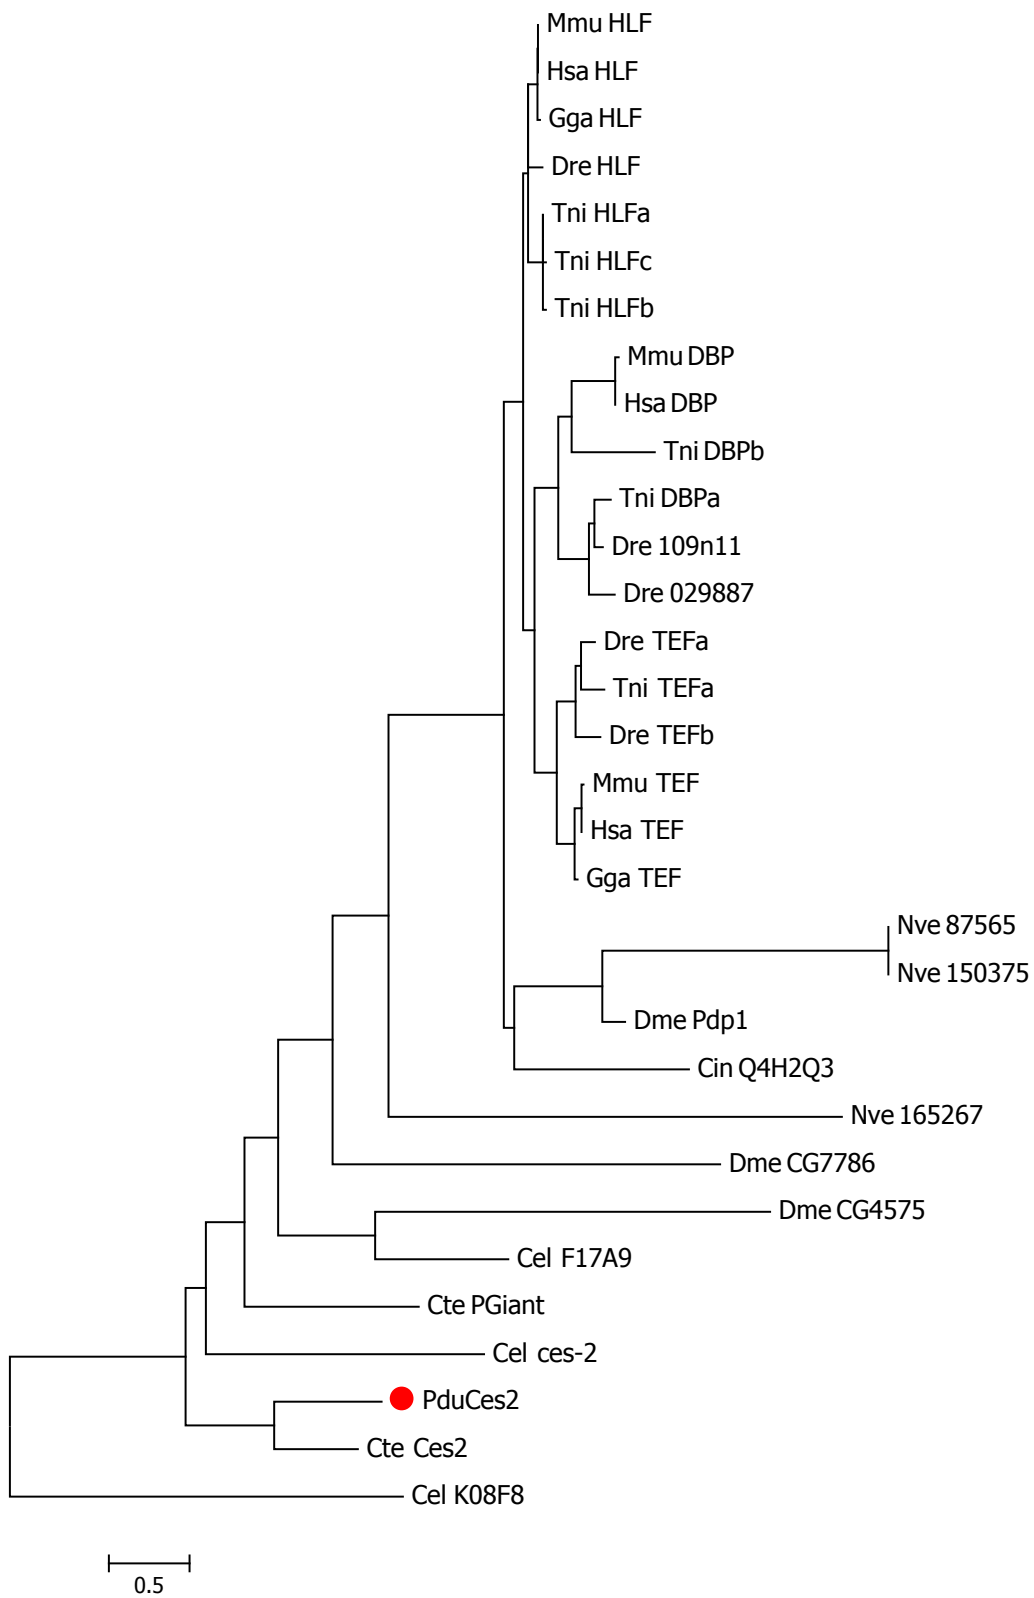

Cpe NJ

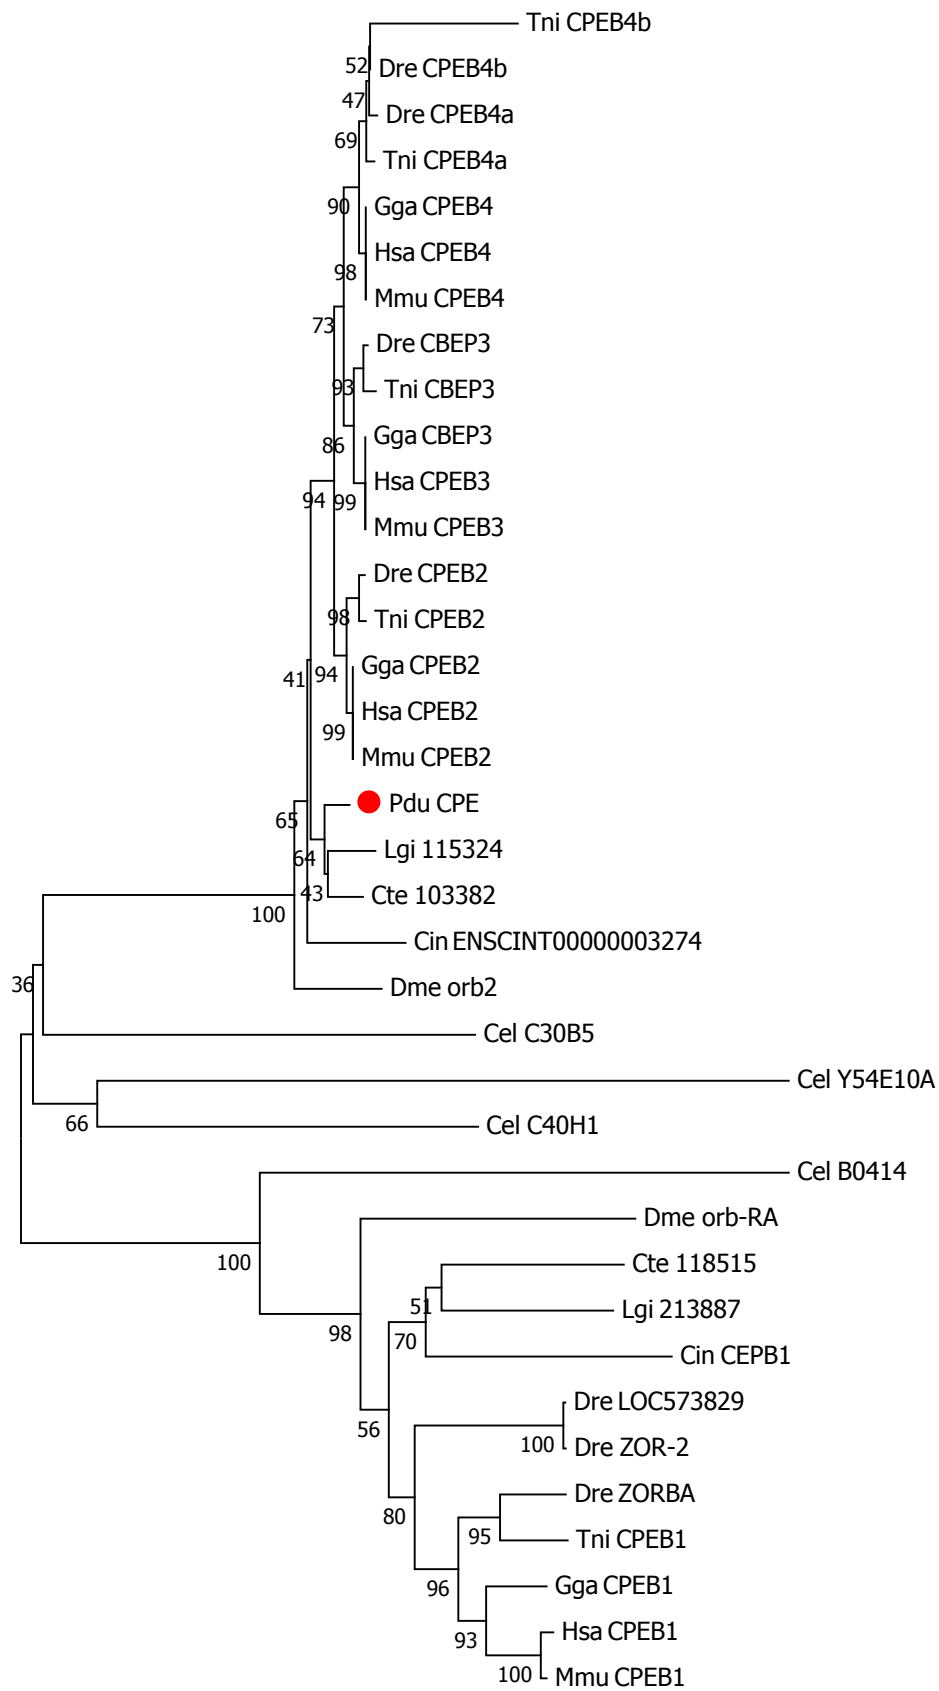

0.1

Cpe ML

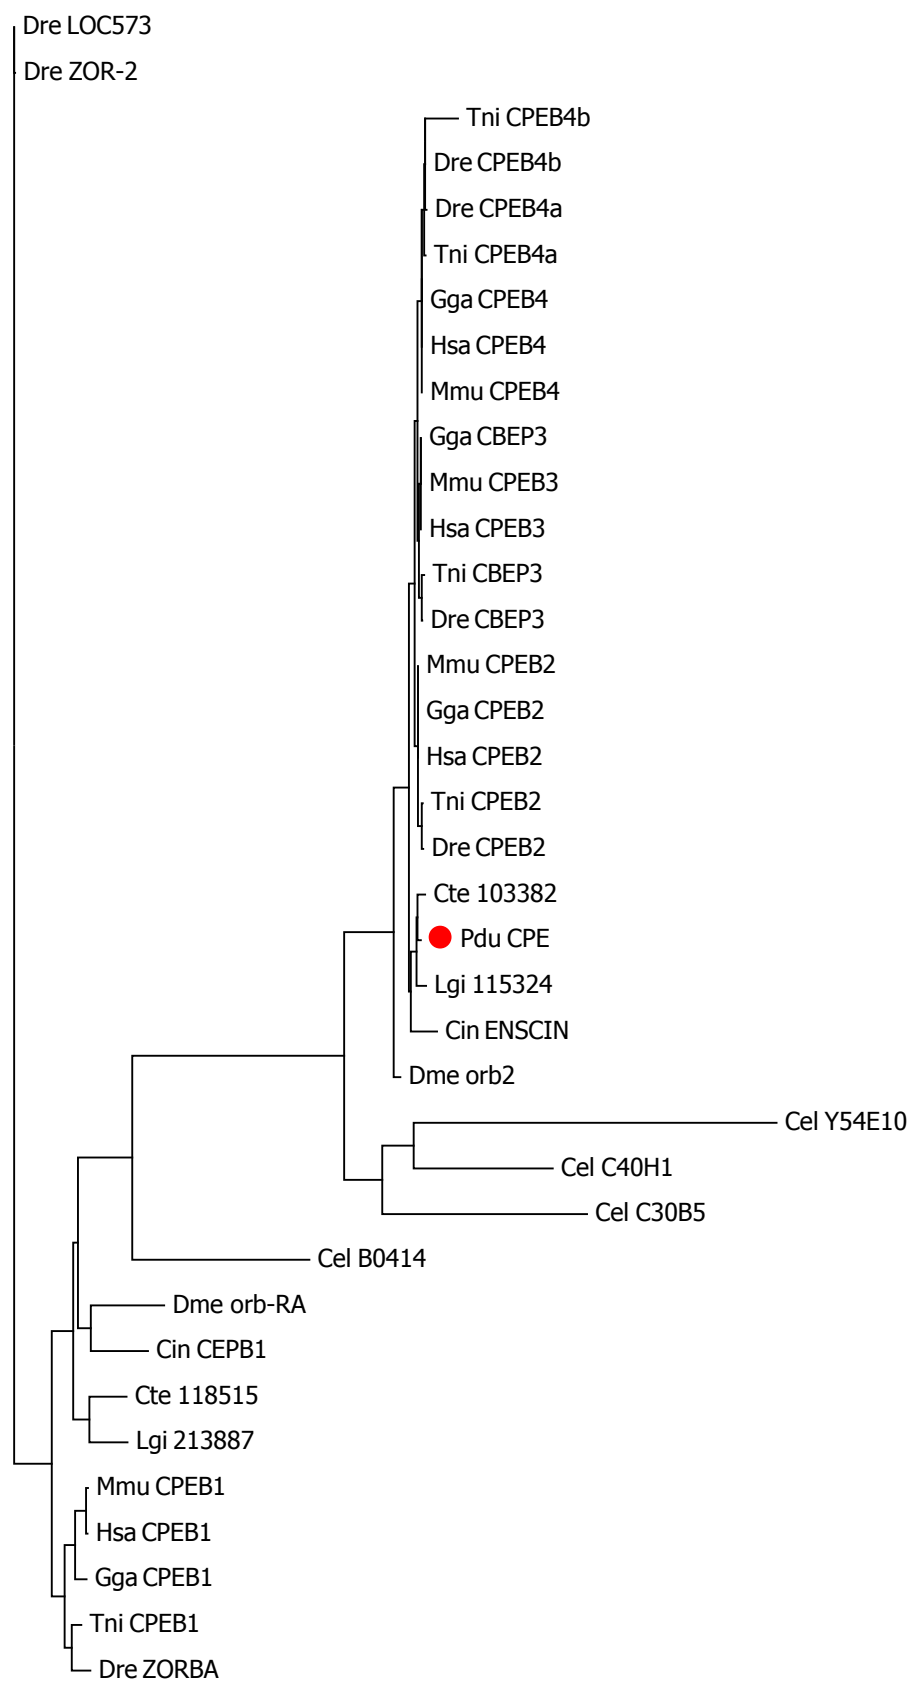

0.2

### Ctbl1 NJ

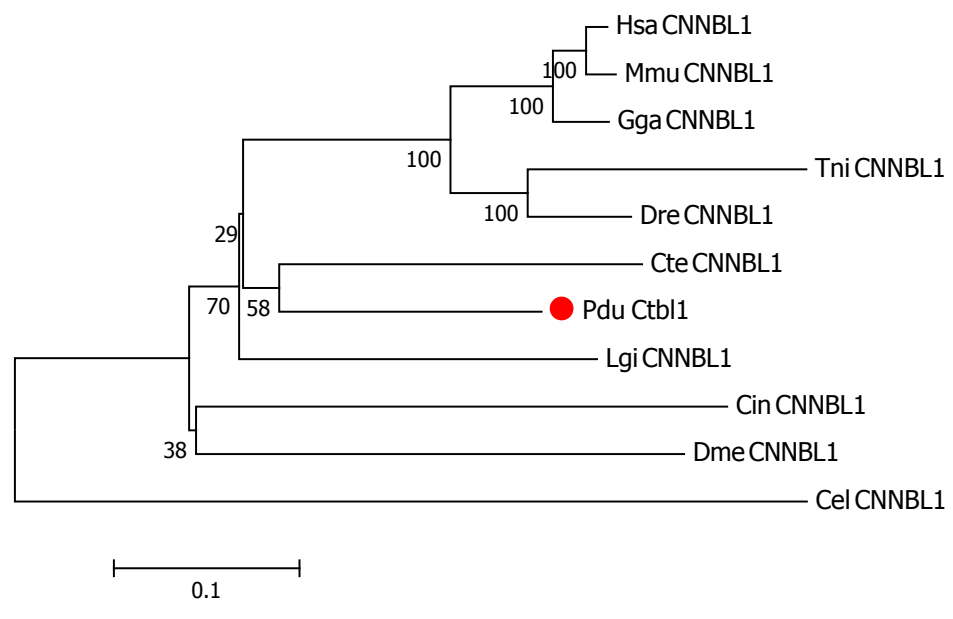

### Ctbl1 ML

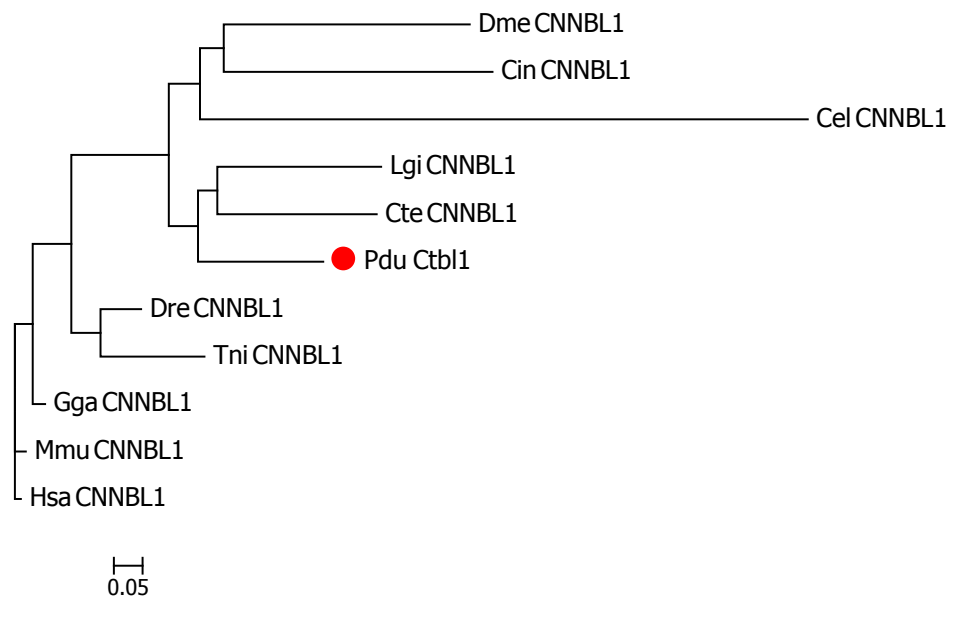



FoxJ NJ

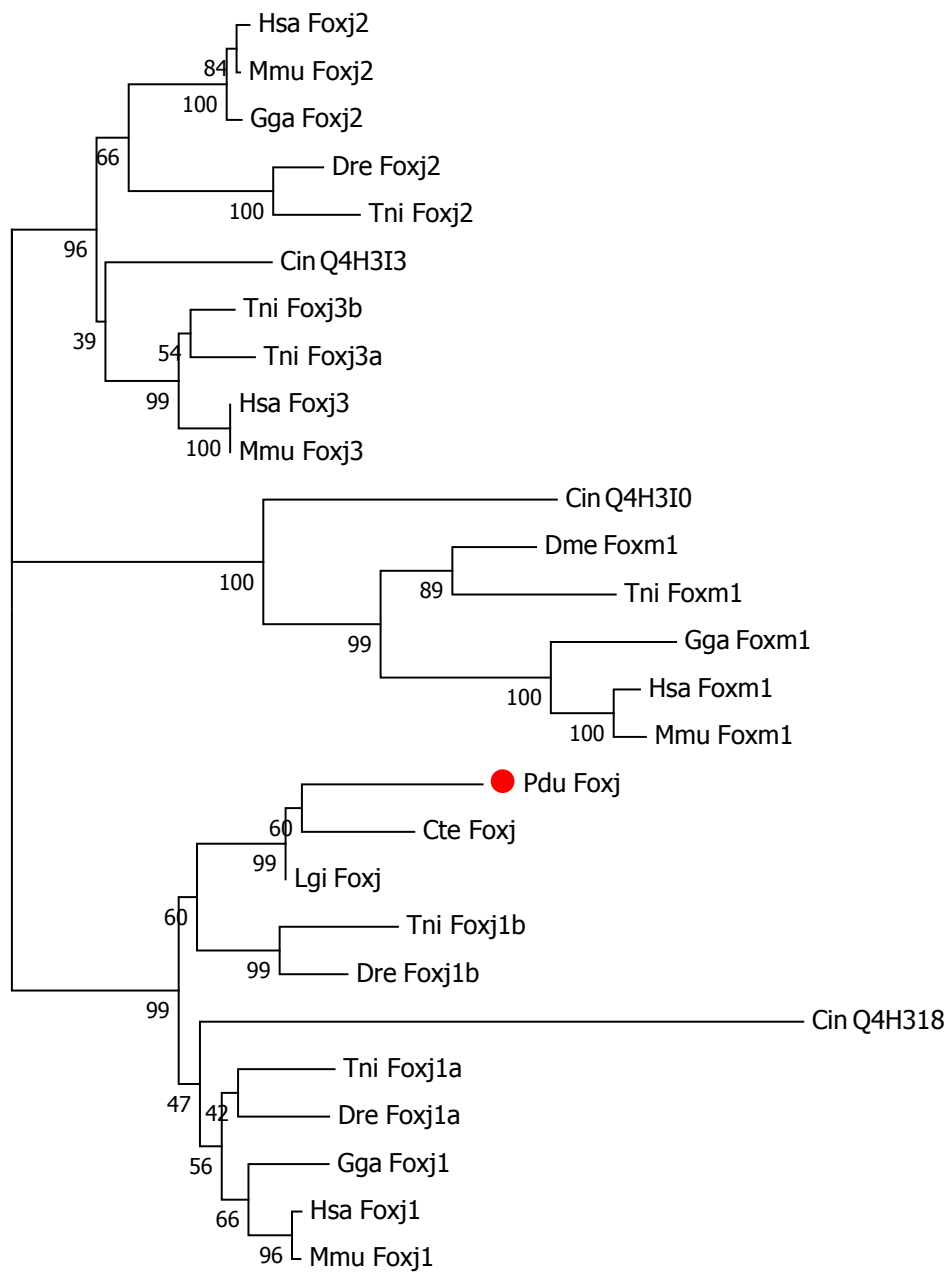

0.1

FoxJ ML

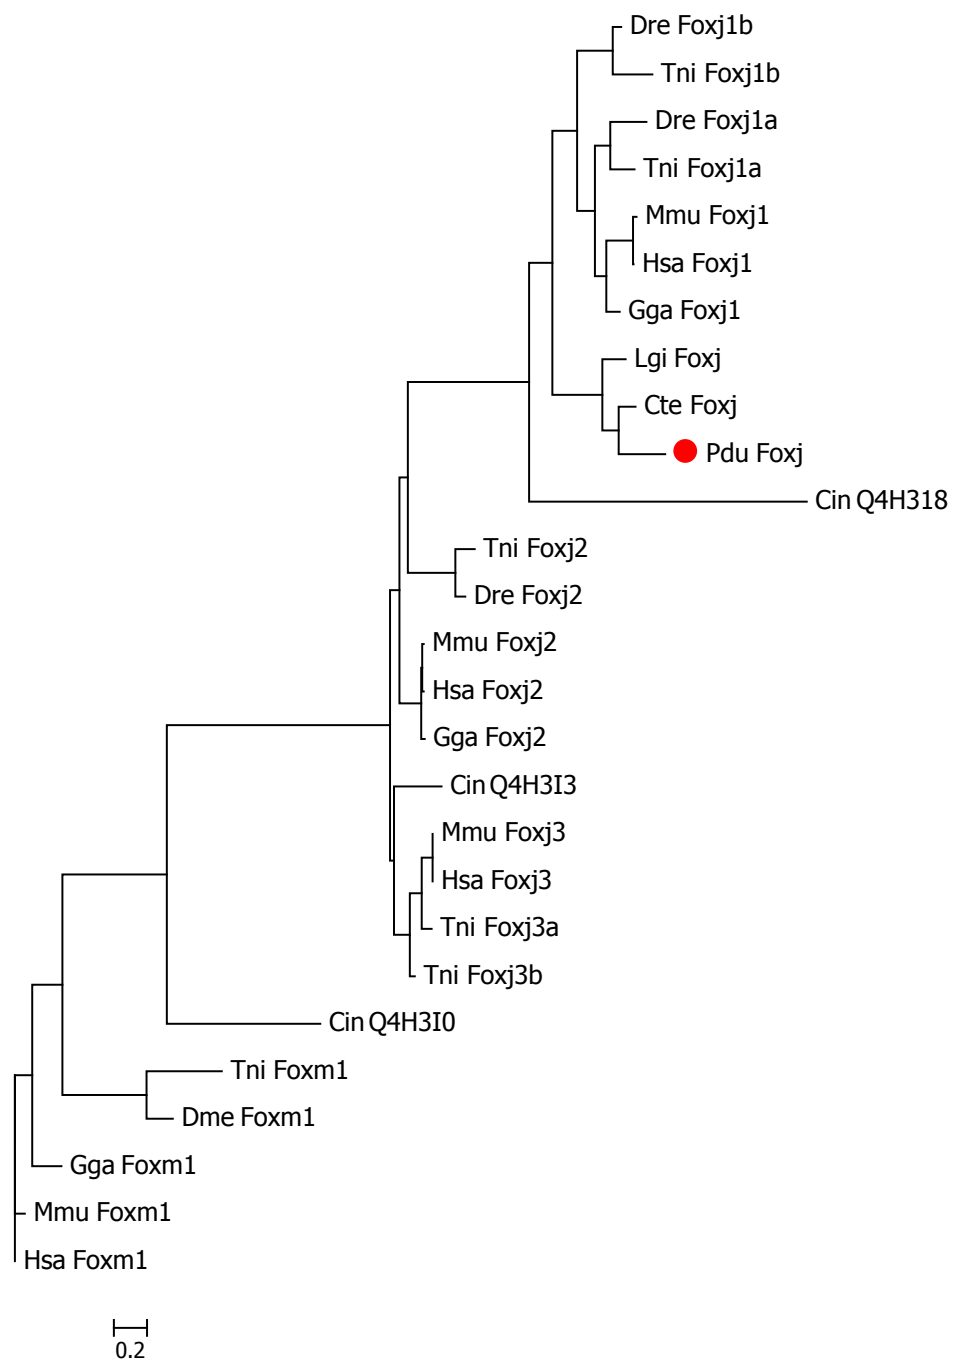



# Frizzled NJ

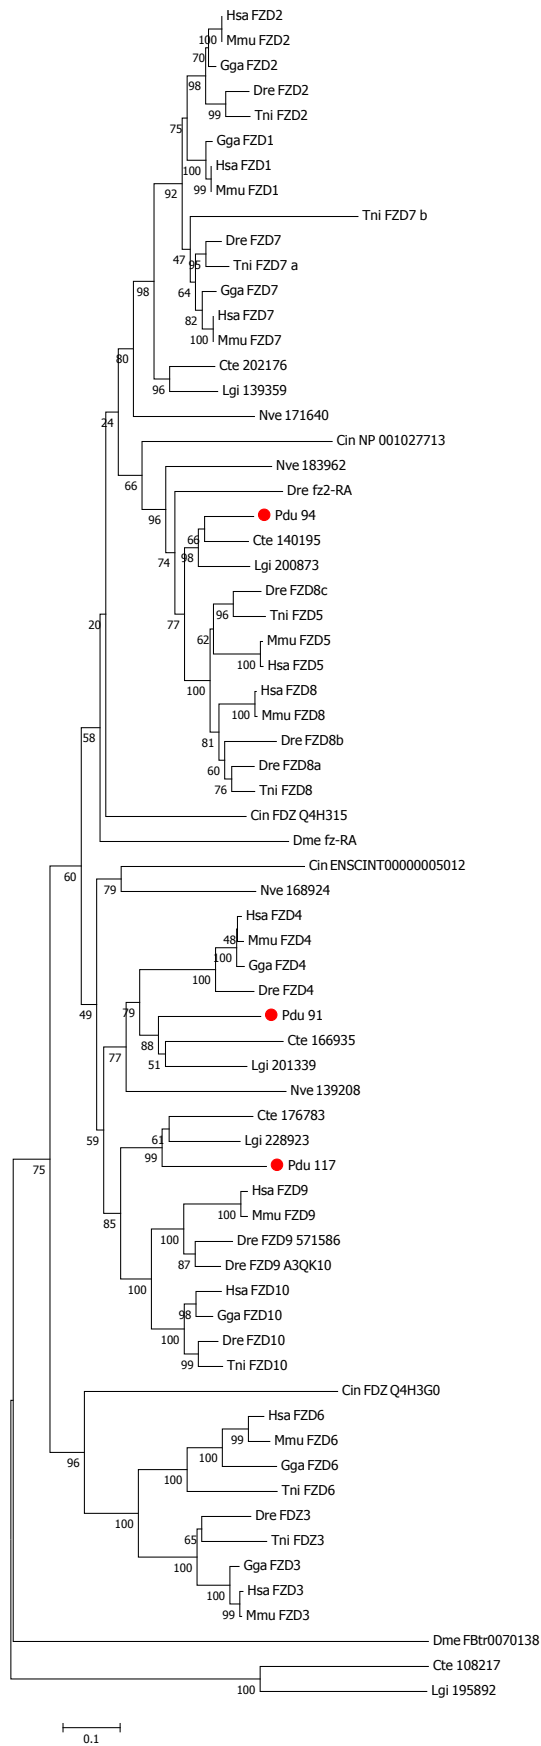

# Frizzled ML

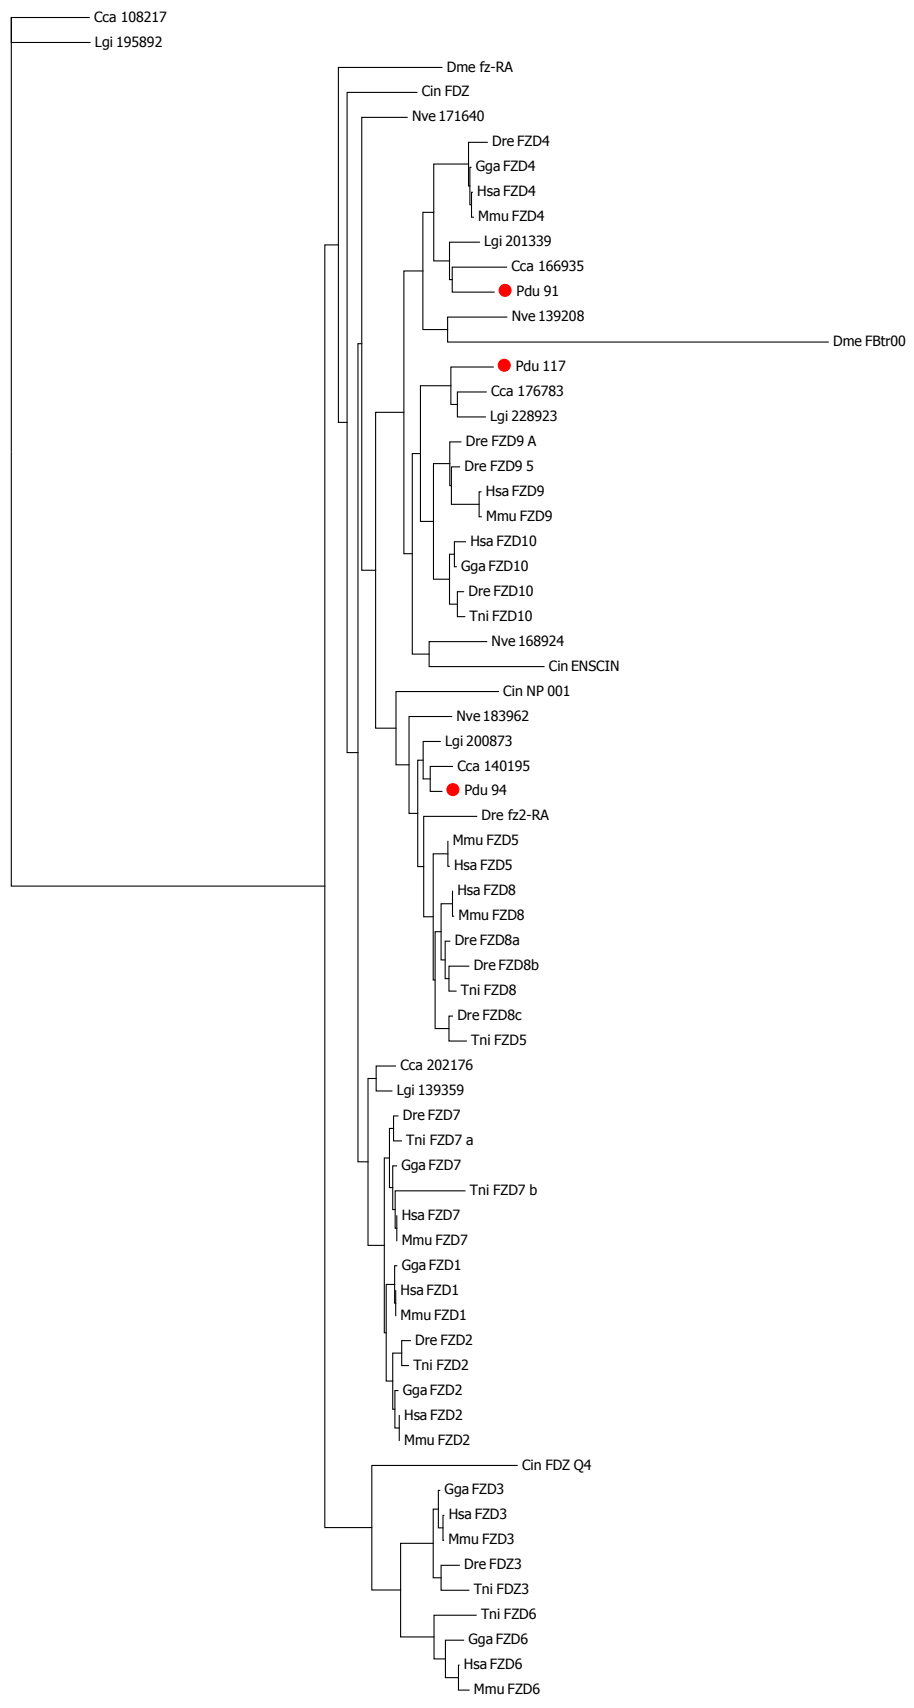

0.5

# Gbrl1 NJ

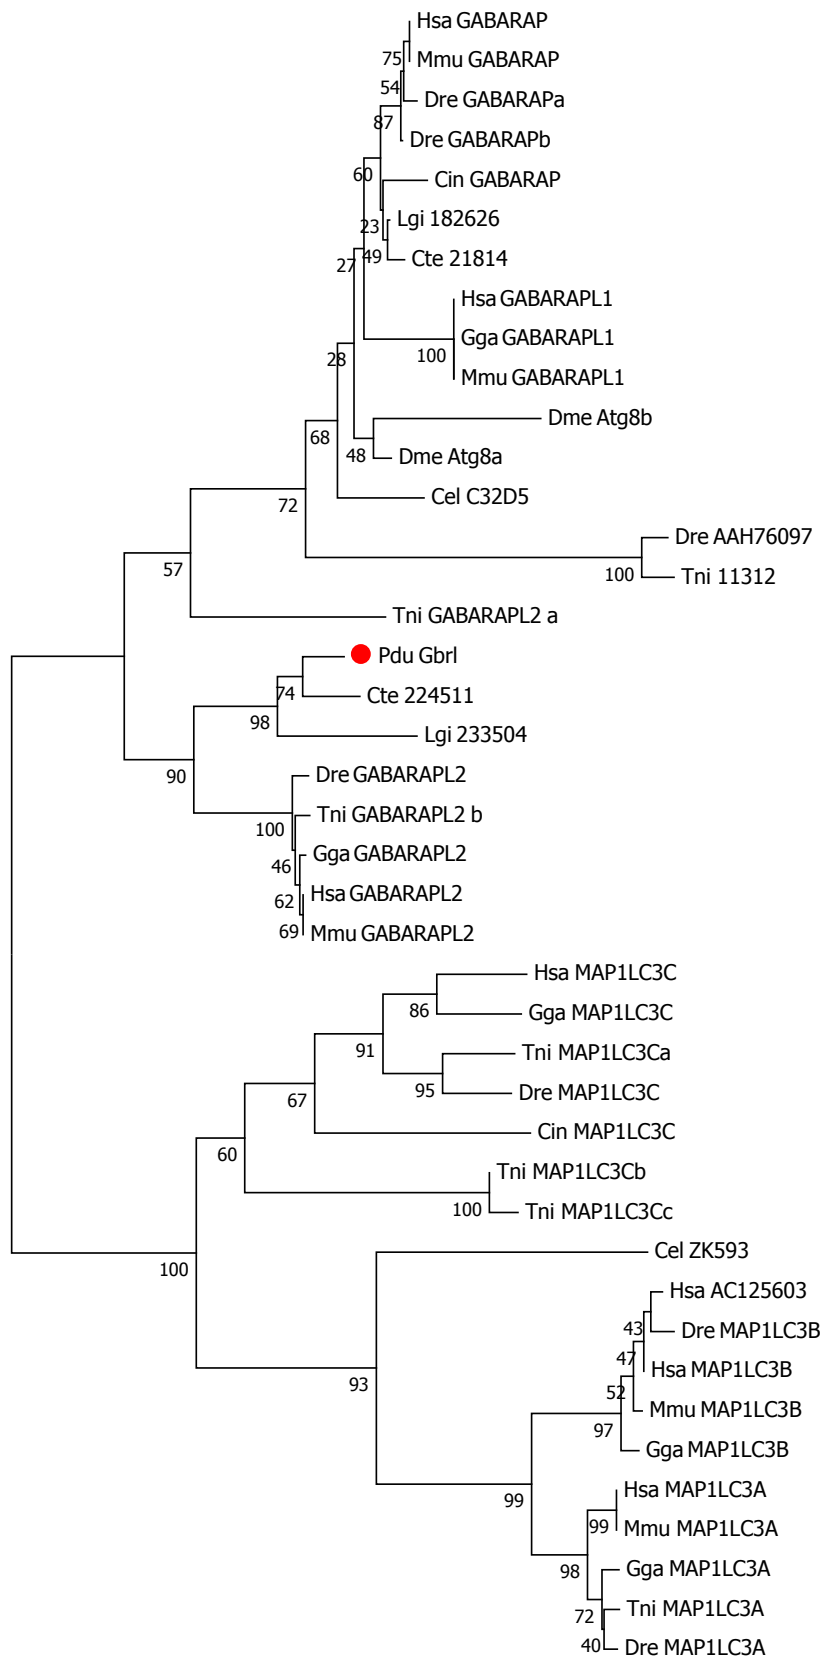

0.1

# Gbrl ML

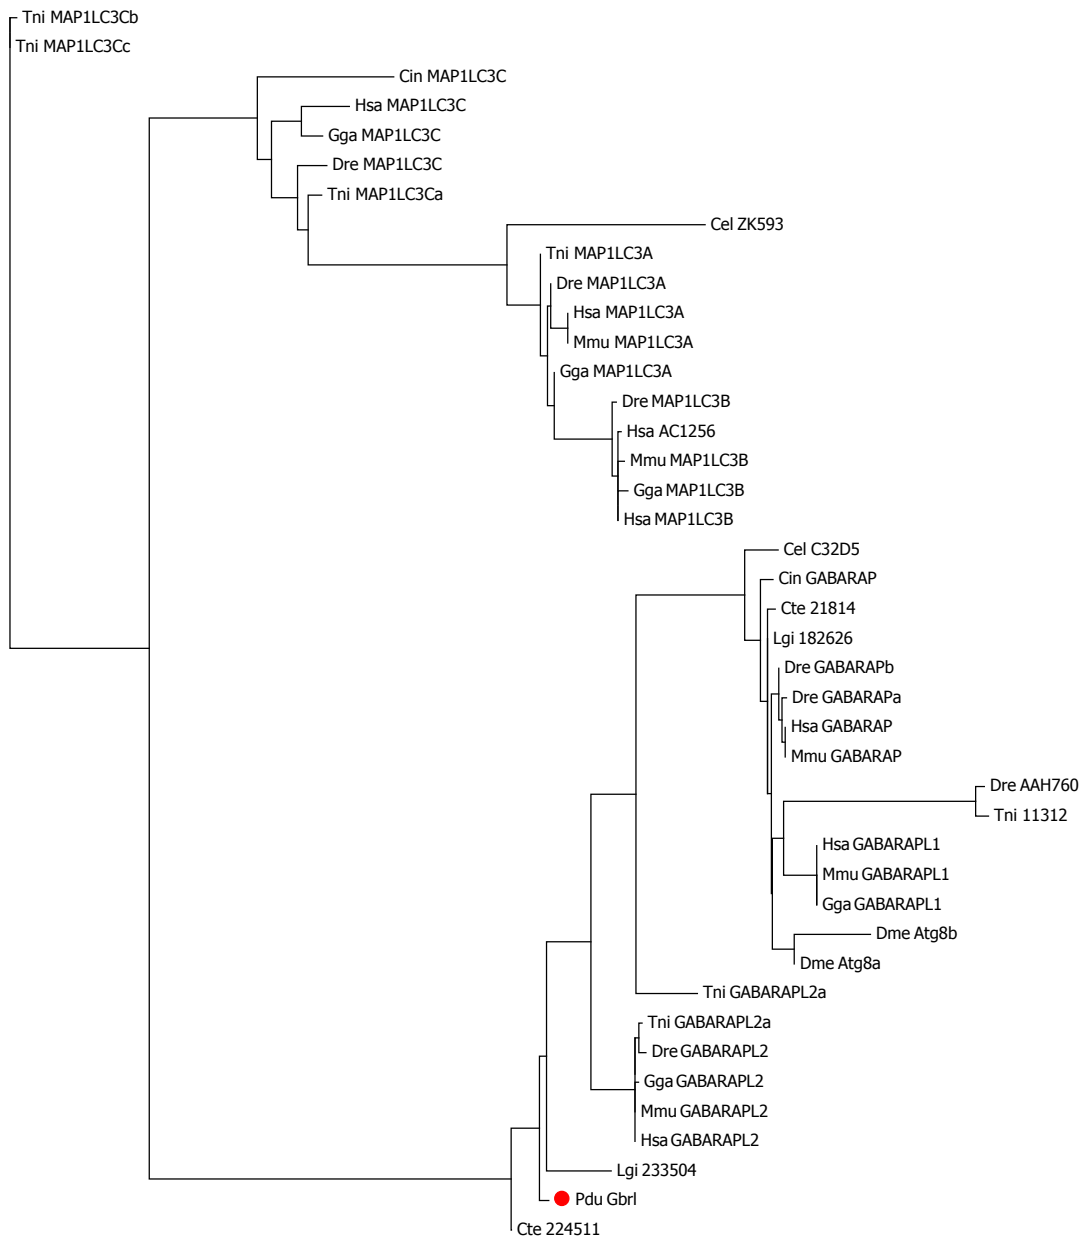

0.2

# Klf NJ

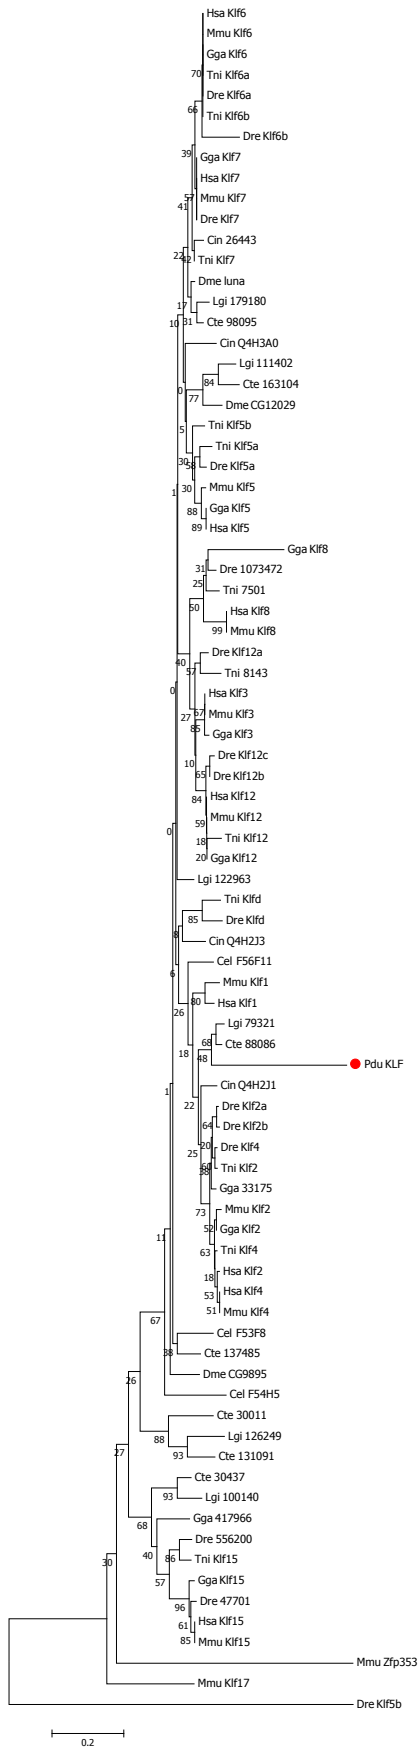

# Klf ML

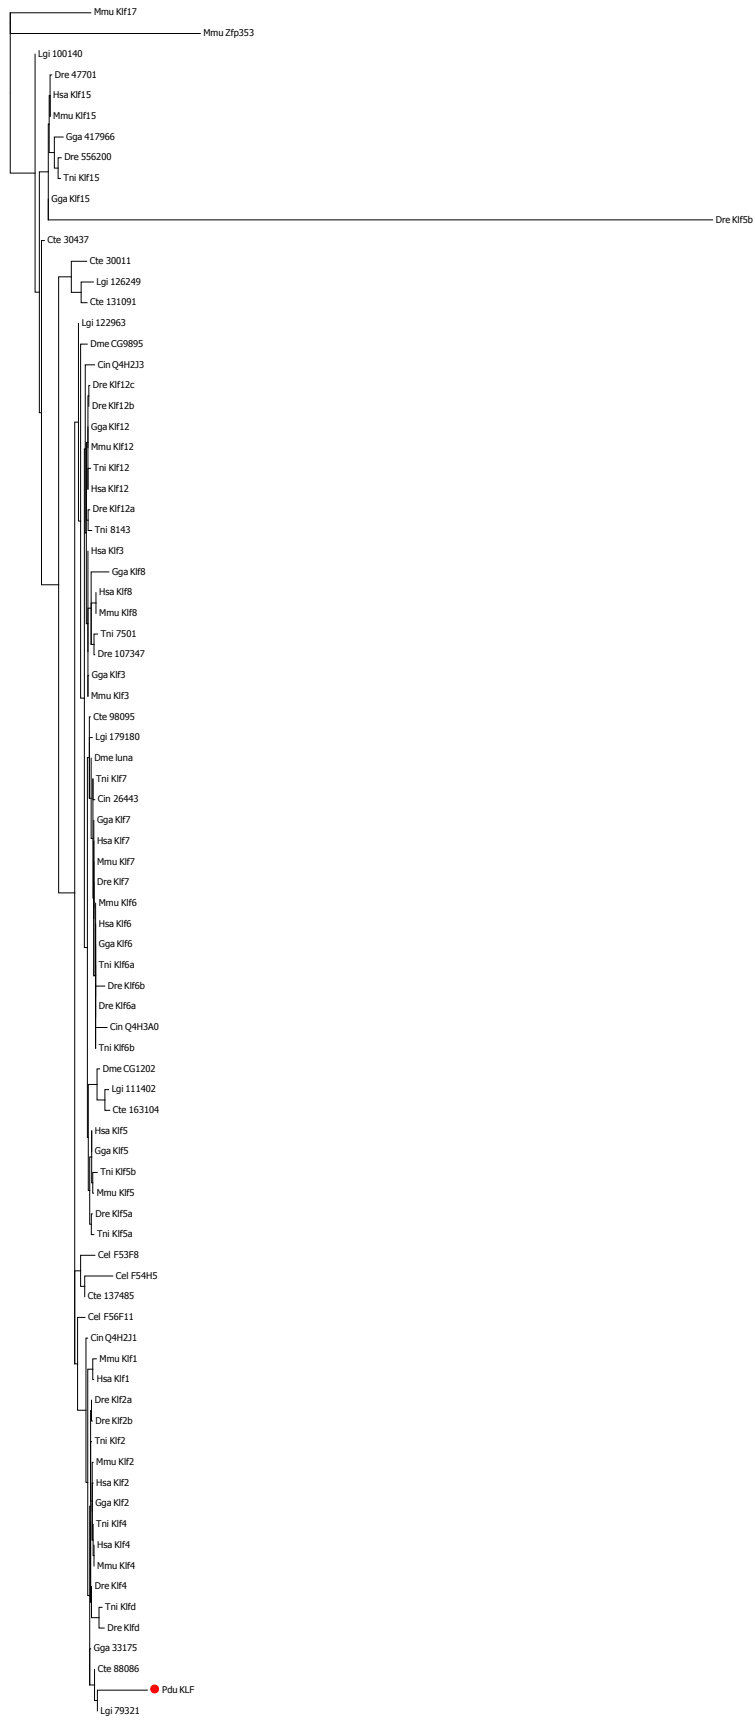

0.5

# Onect NJ

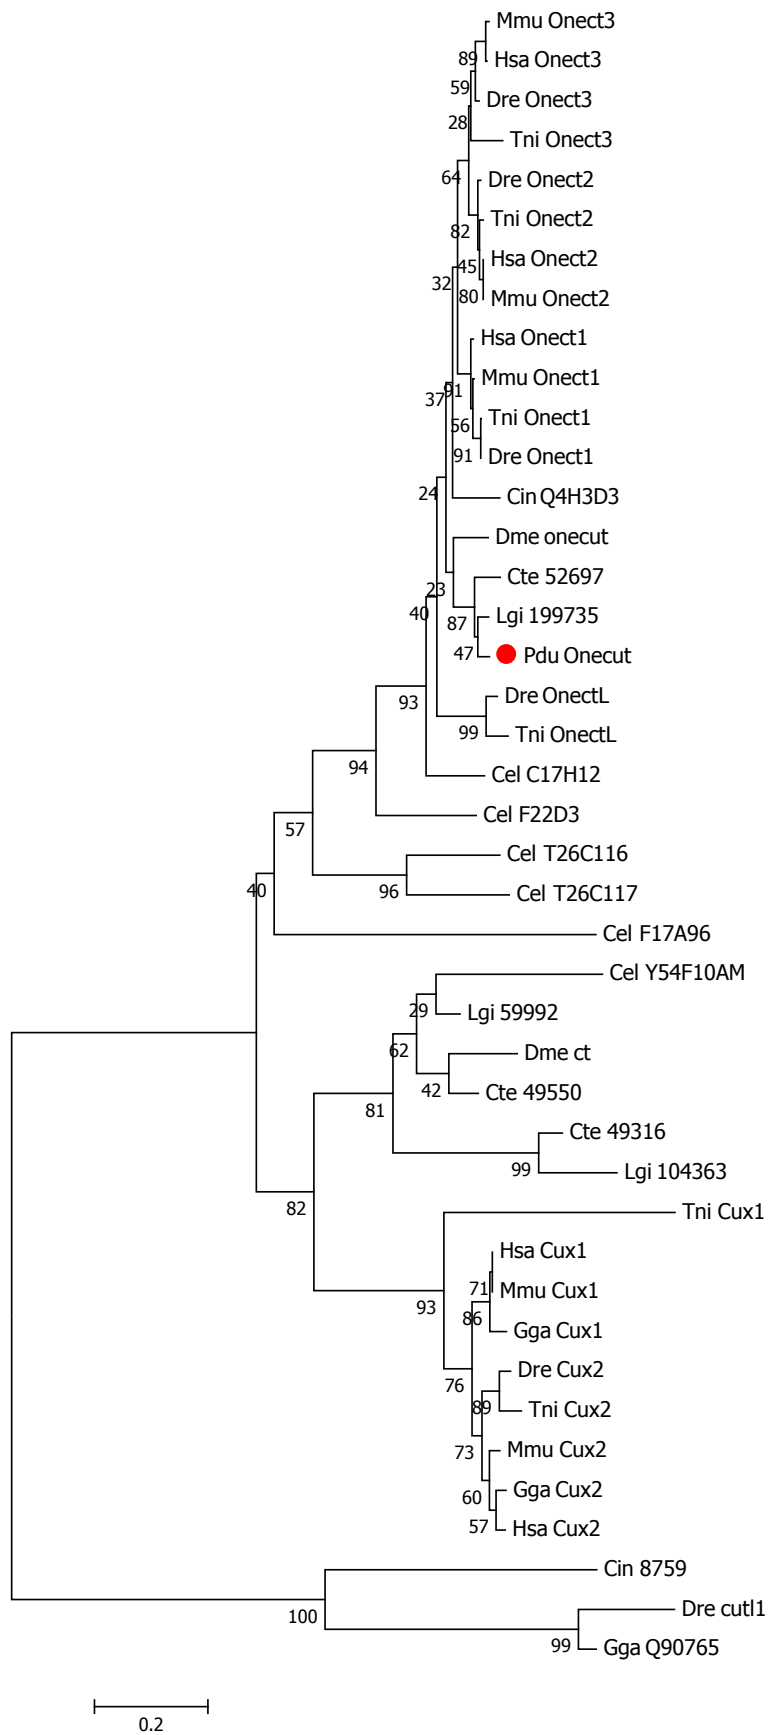

# Onecut ML

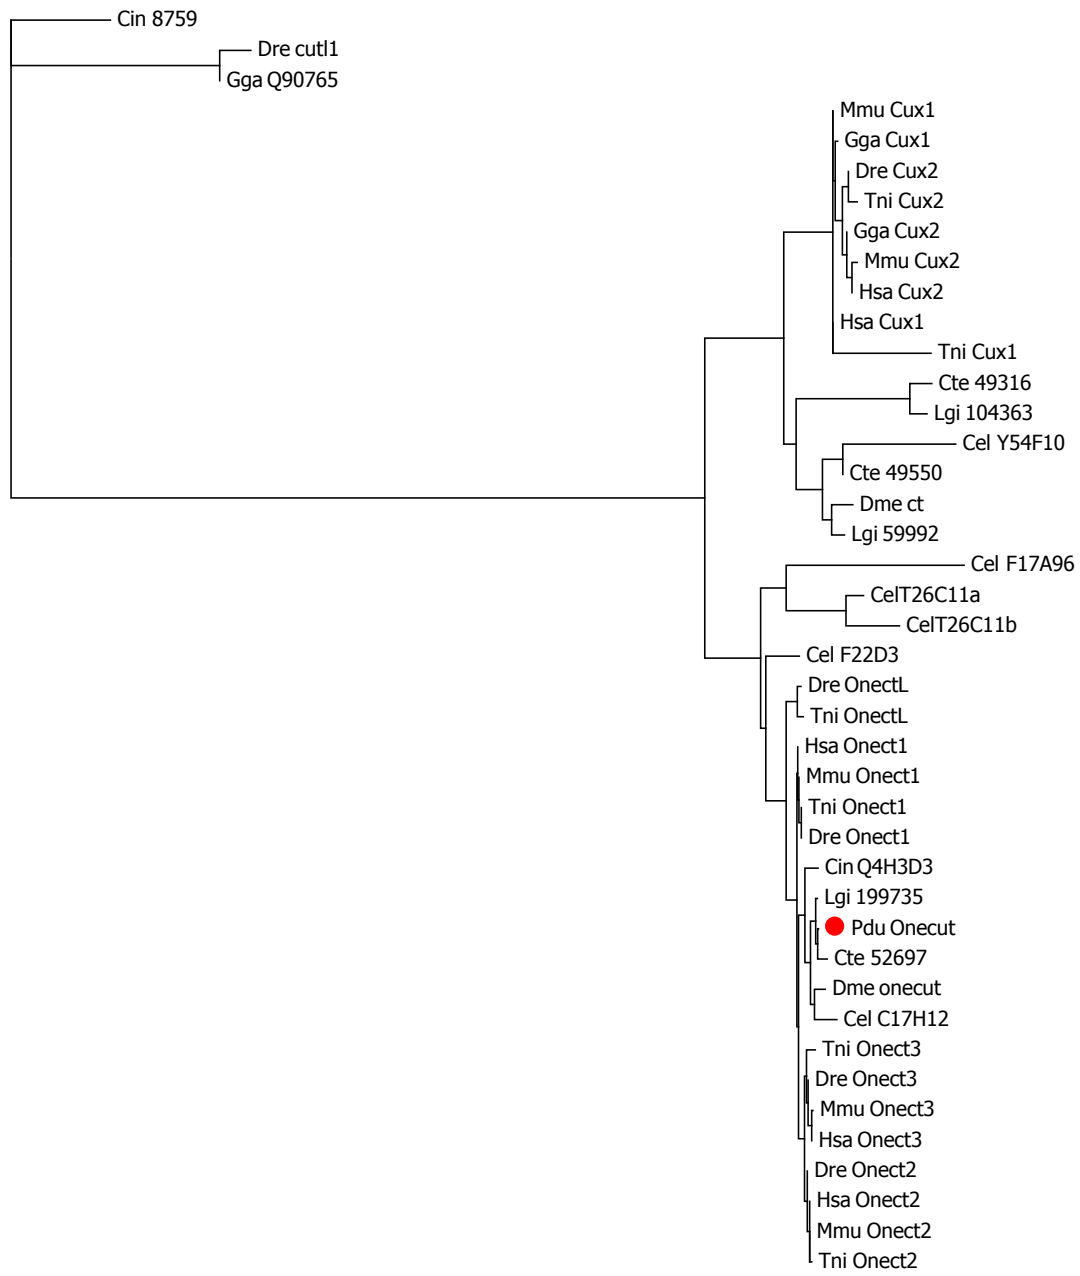

1



# Sfrp NJ

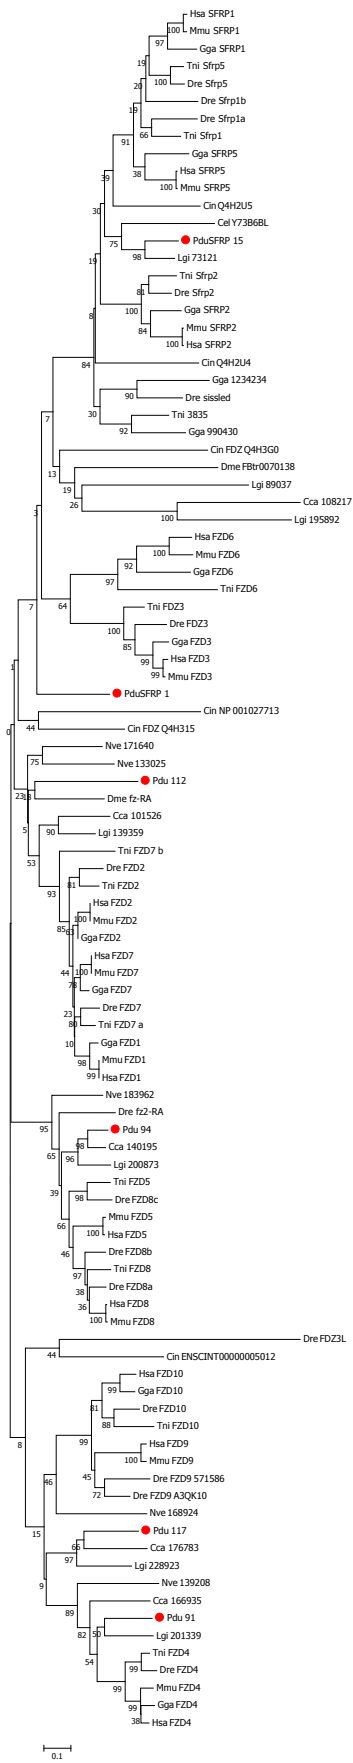

# Sfrp ML

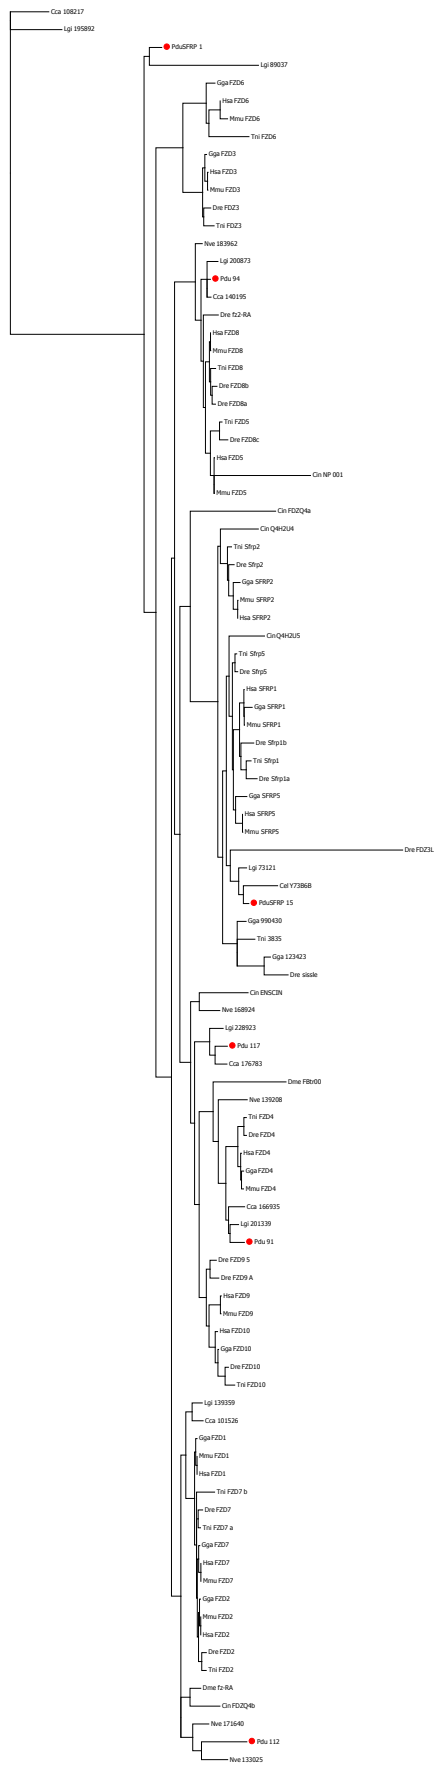

1

### Spondin NJ

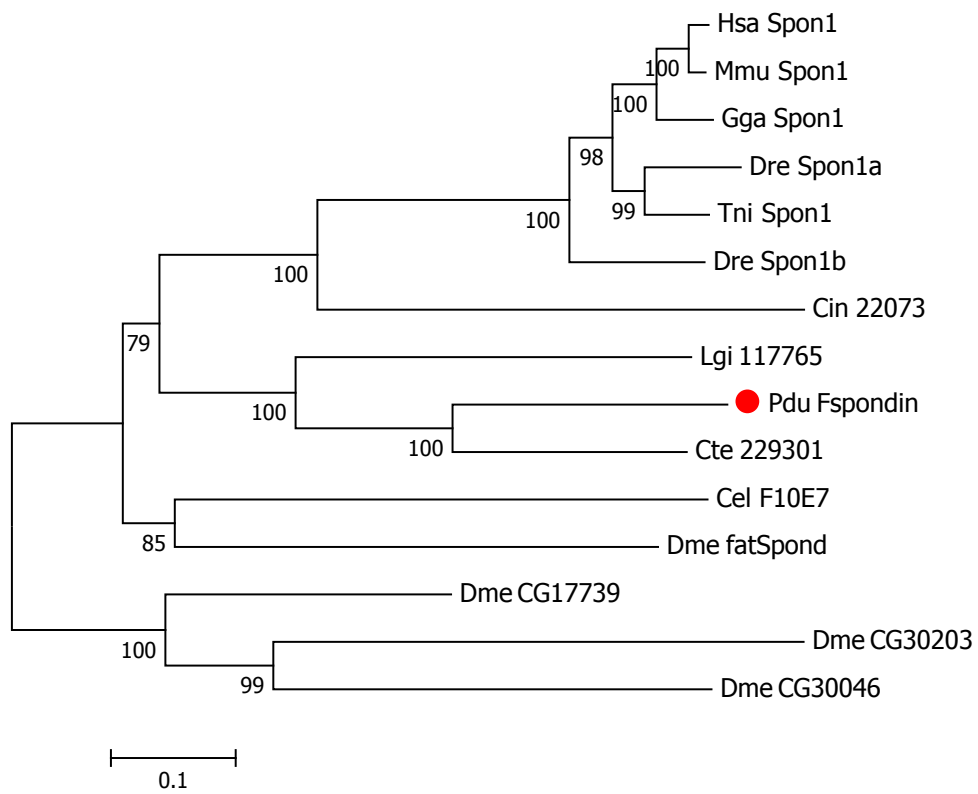

### Spondin ML

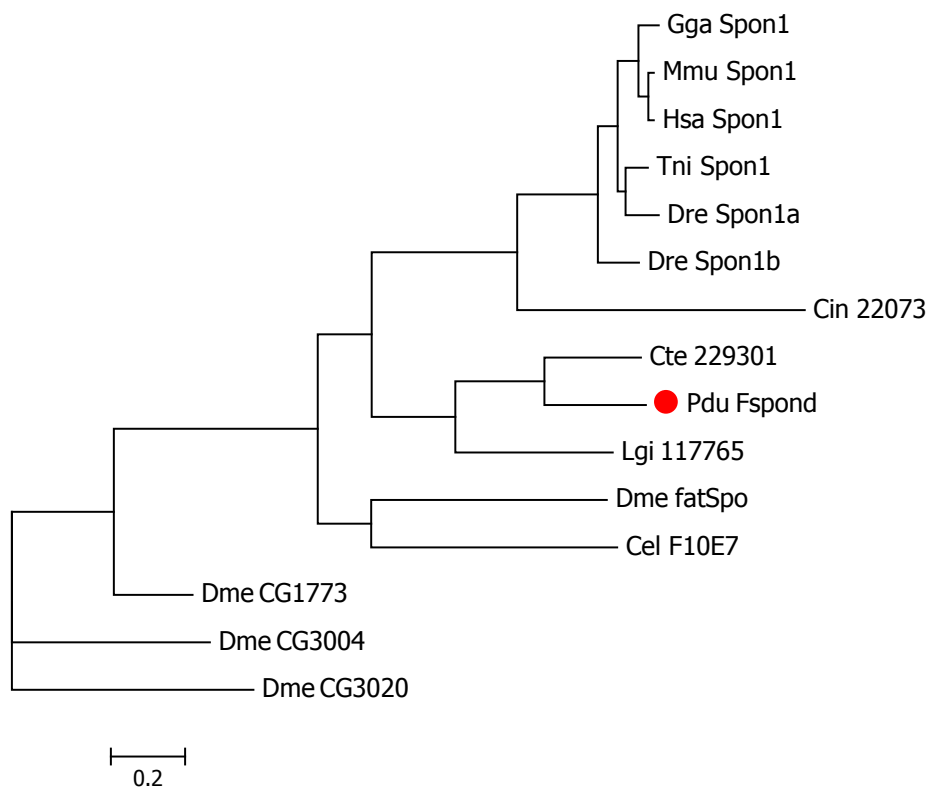

# Tektin2 NJ

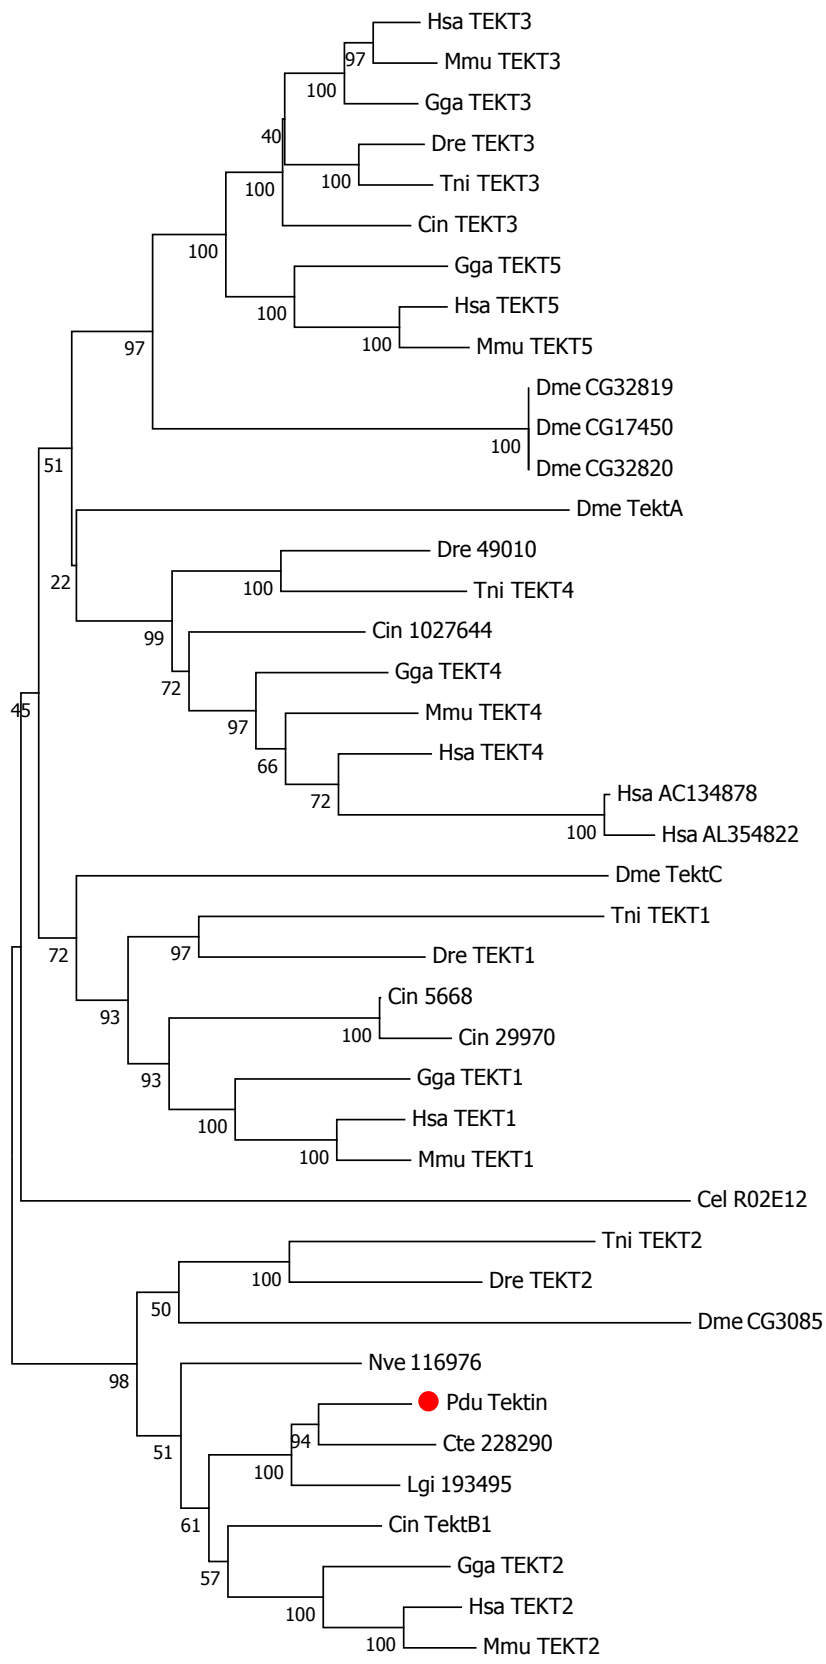

0.1

# Tektin2 ML

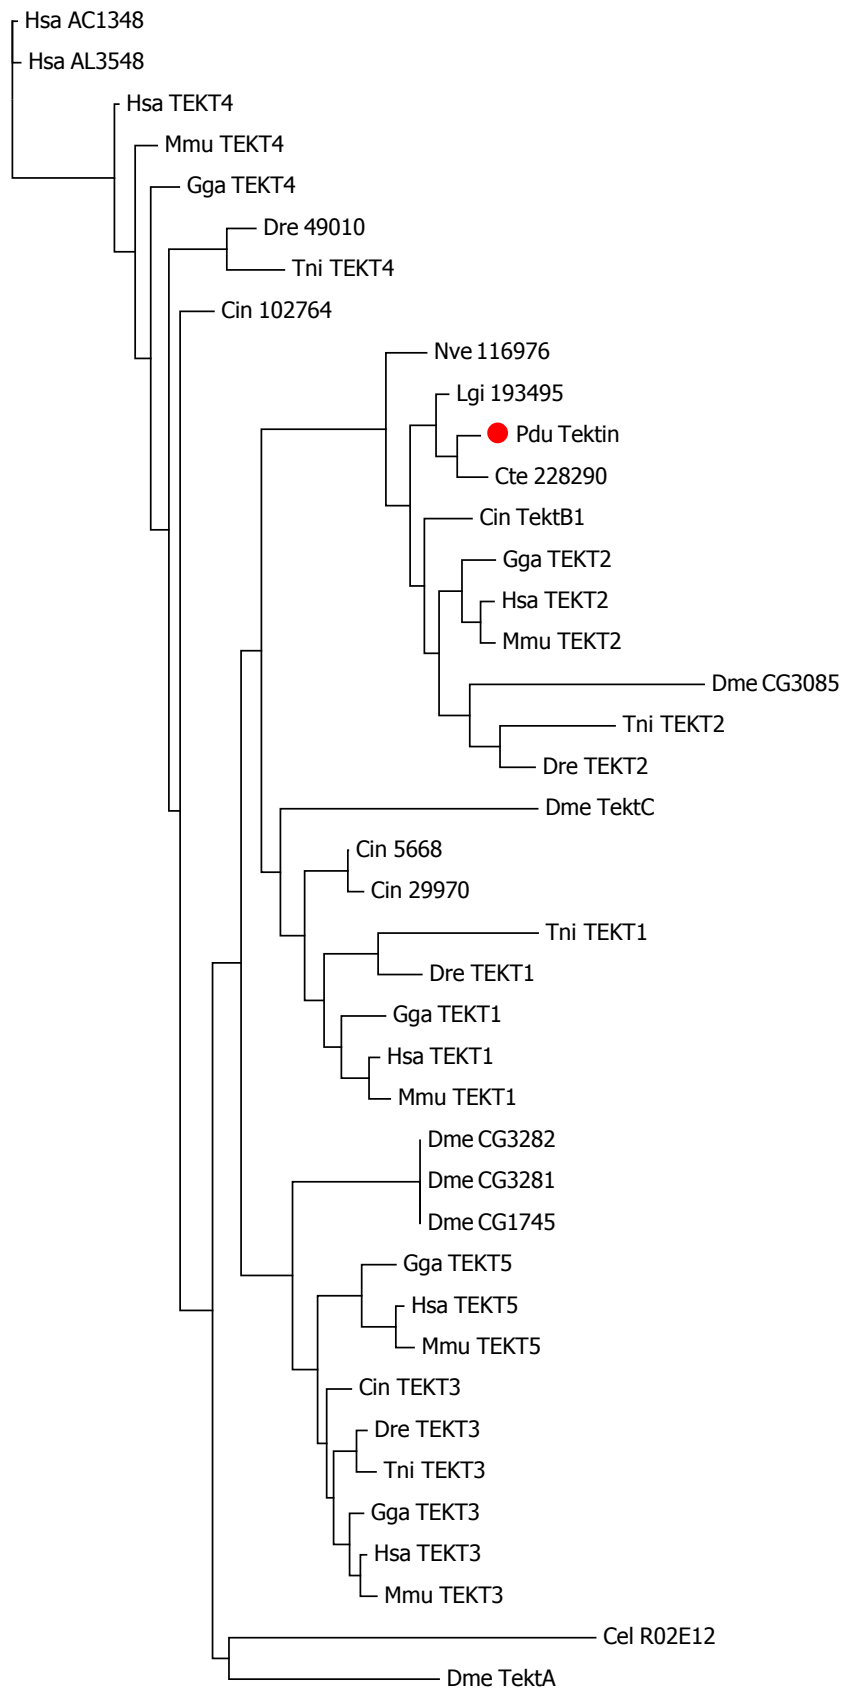

0.2

# Tubby NJ

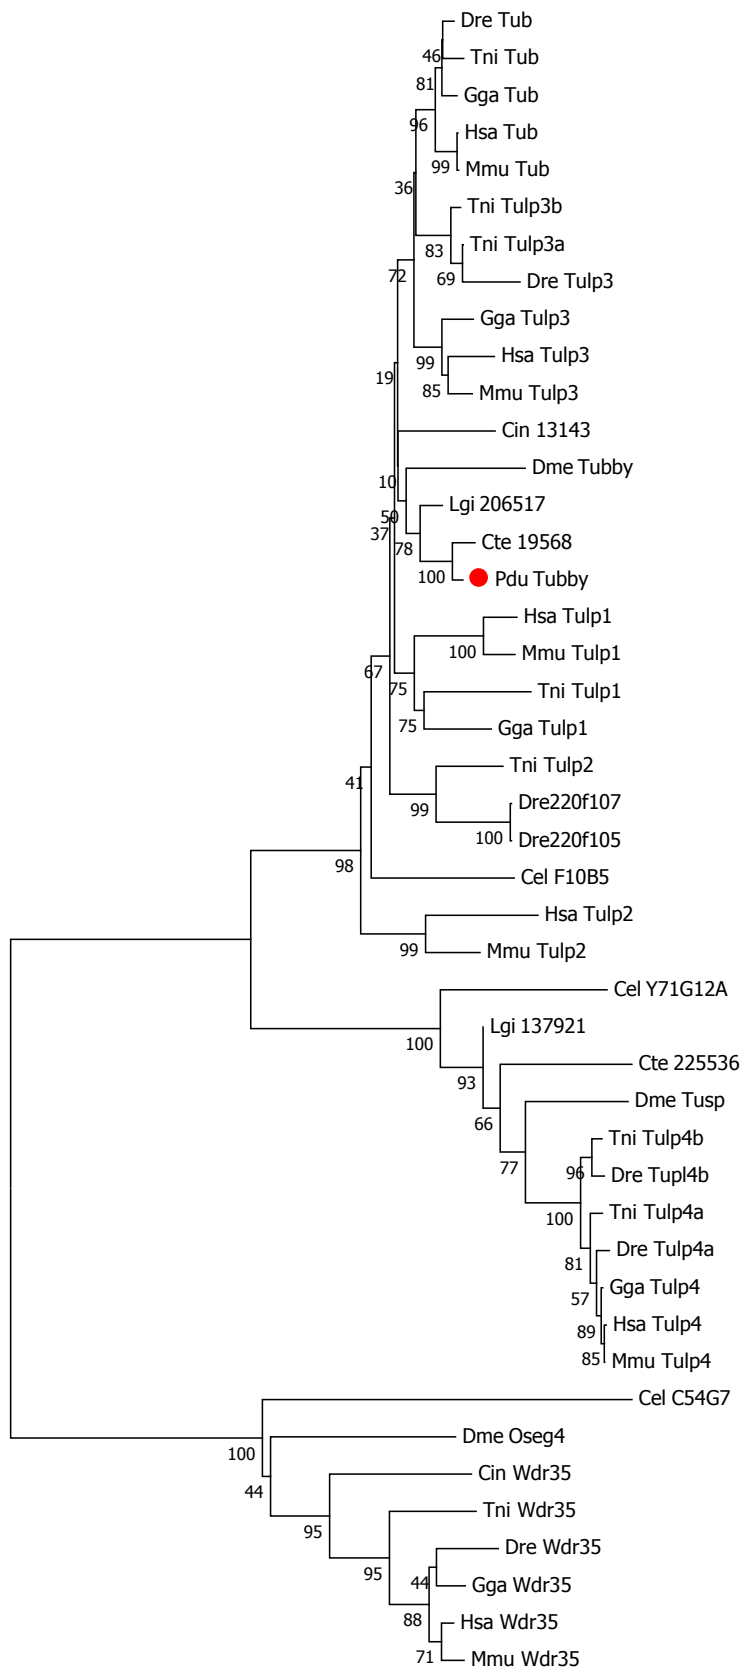

0.2

# Tubby ML

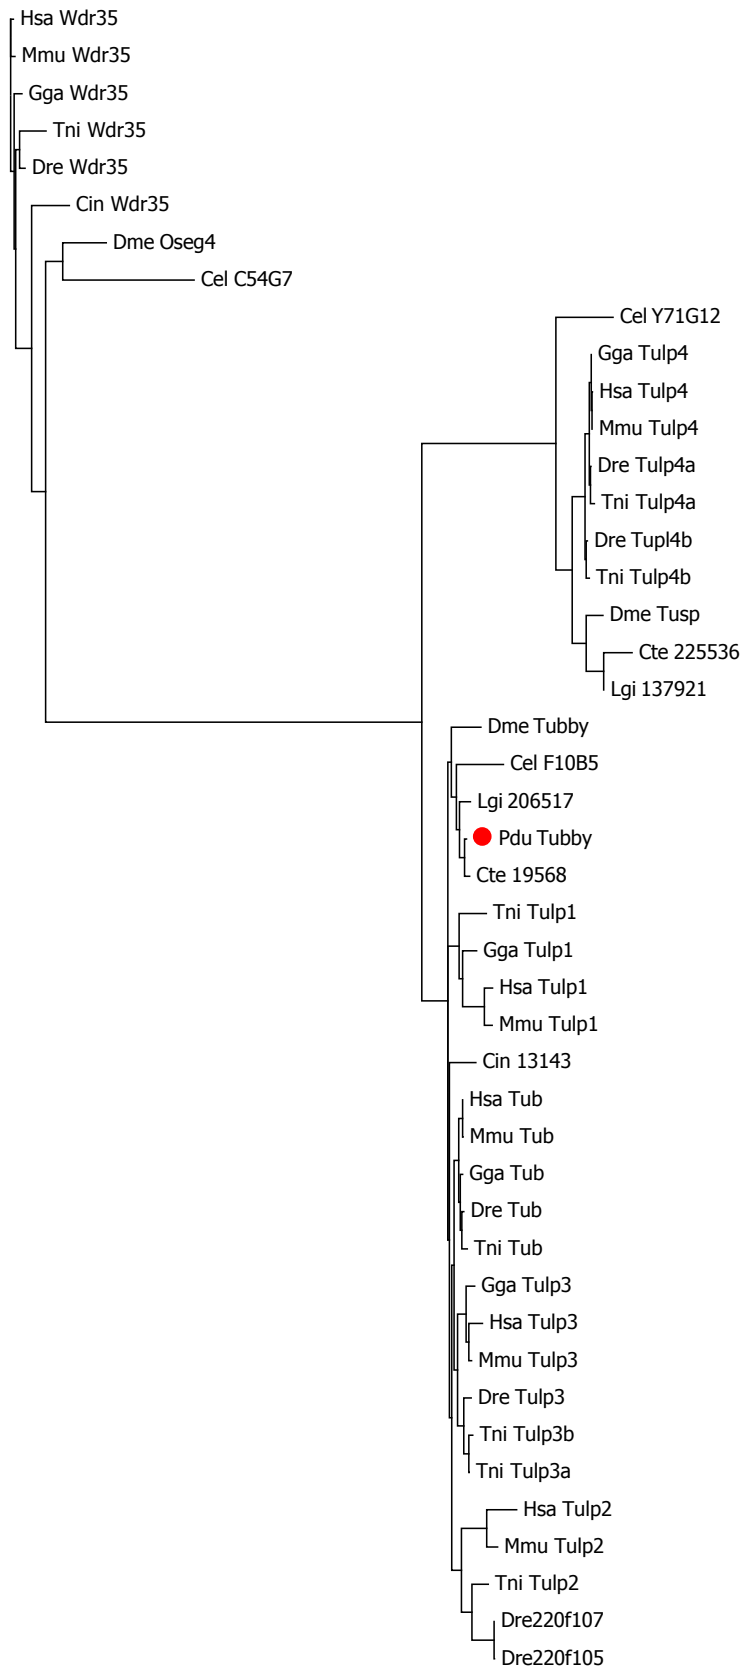

0.5
